# Supplementary material for: A cisplatin conjugate with tumor cell specificity exhibits antitumor effects in renal cancer models
Source: Springer Nature journal article supplement (doi:10.1186/s12885-023-10878-3), 2023-06-02
Supplement: MOESM1 [file 25440666]

Control                      CIS ( $\mu\text{M}$ )                      DZ-CIS ( $\mu\text{M}$ )

---

4                      8                      16                      4                      8                      16

PARP

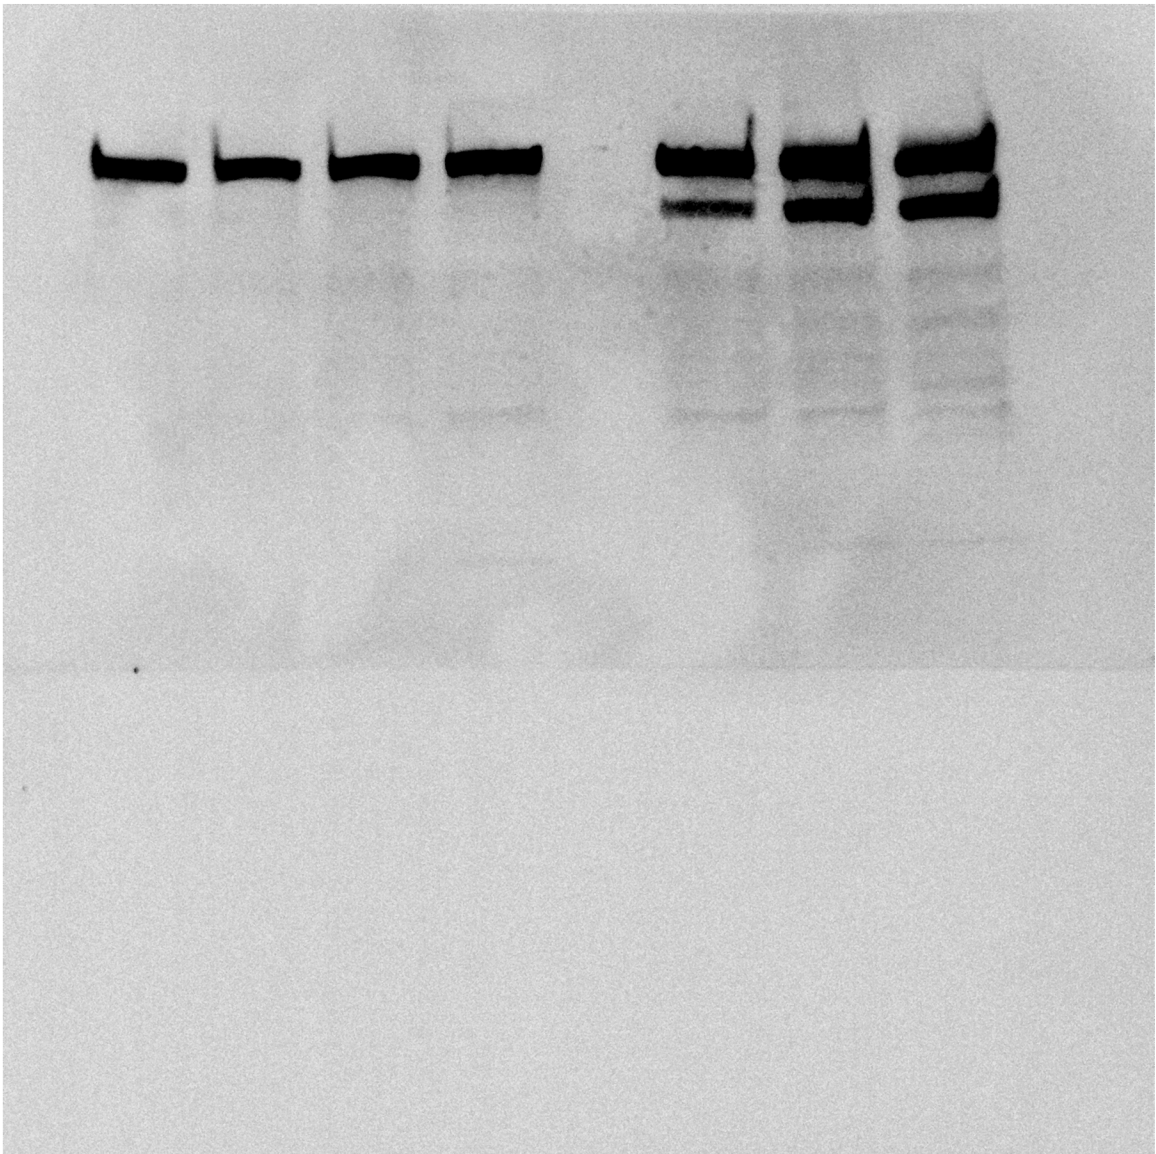

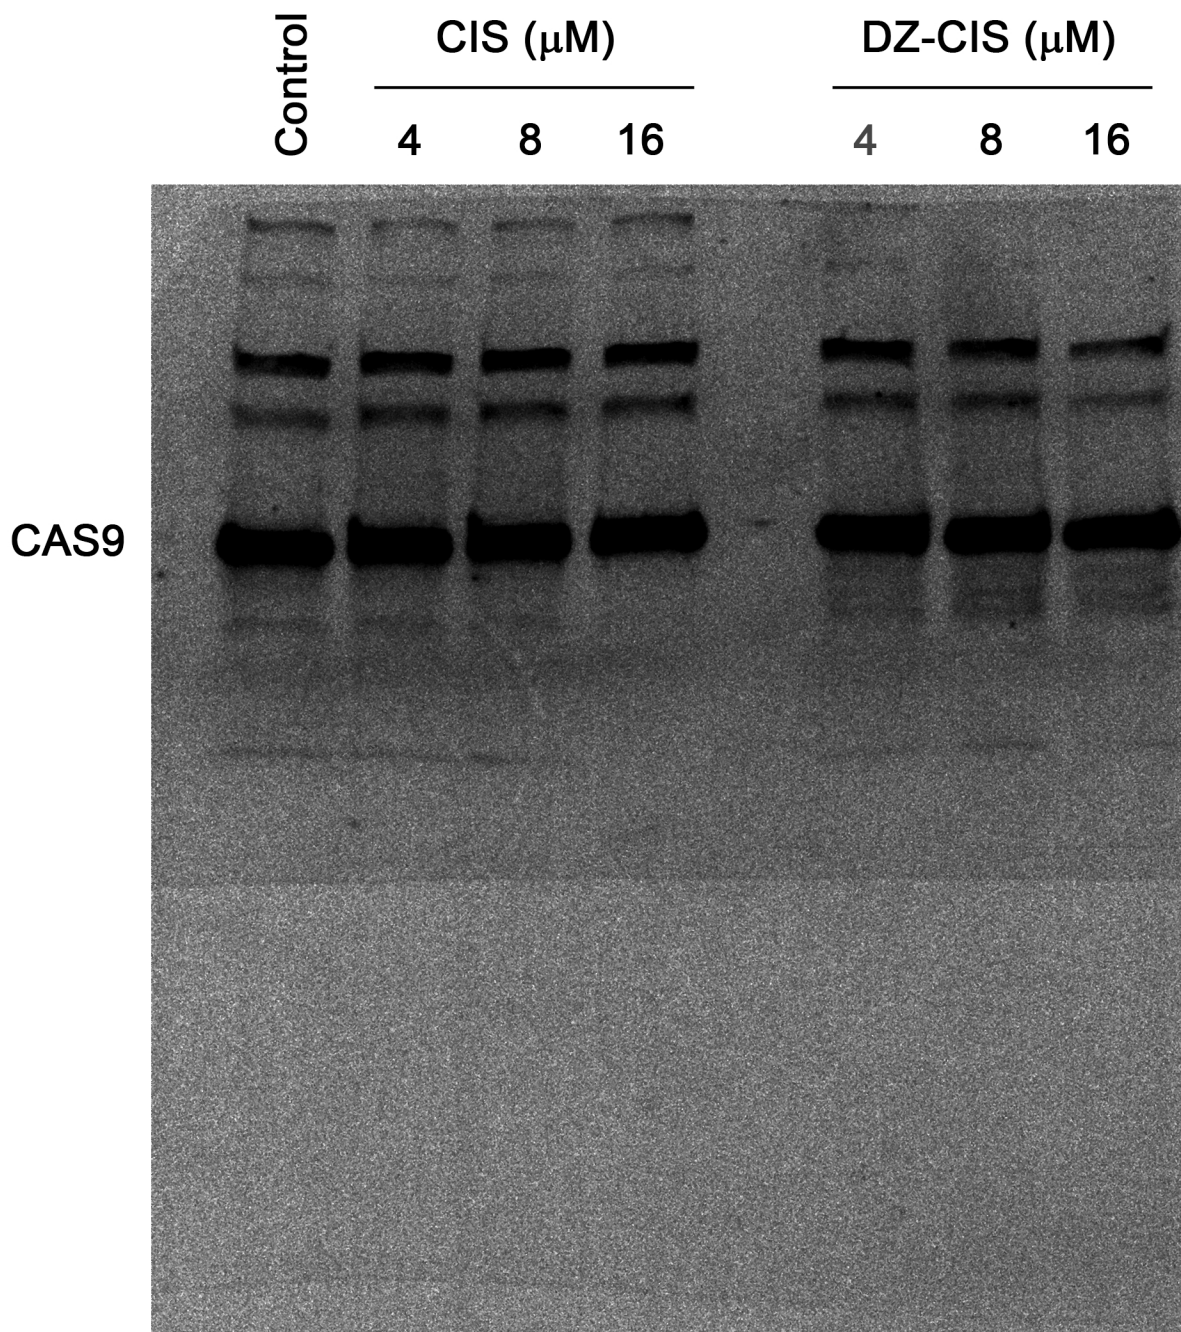

Control

CIS ( $\mu\text{M}$ )

DZ-CIS ( $\mu\text{M}$ )

4

8

16

4

8

16

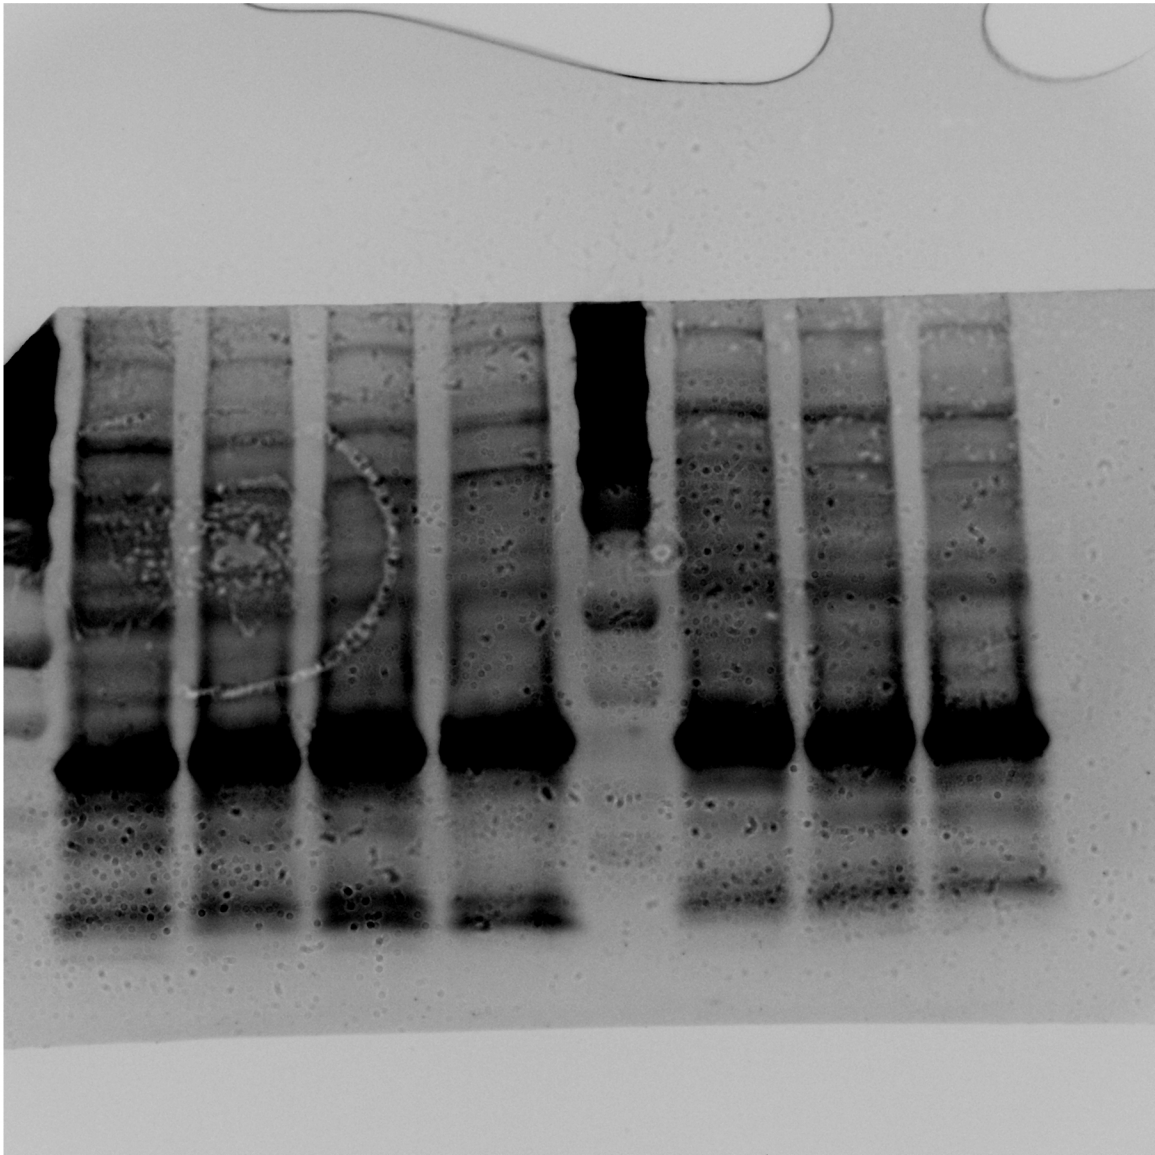

CAS3

Control

CIS ( $\mu\text{M}$ )

DZ-CIS ( $\mu\text{M}$ )

4

8

16

4

8

16

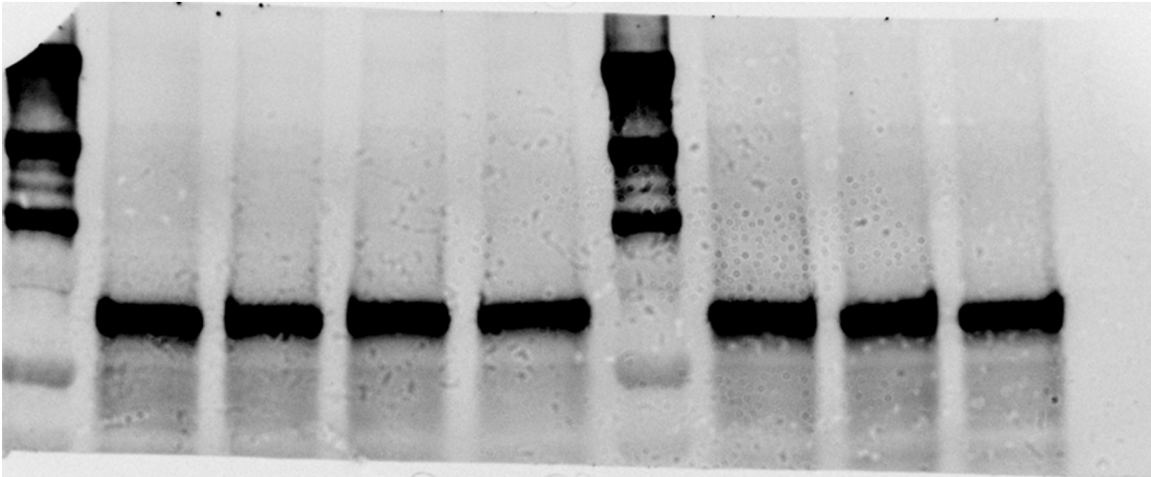

$\beta$ -actin
